# Supplementary material
Source: publisher figshare collection journal article supplement (https://frontiersin.figshare.com/ndownloader/files/15296894)
Supplement: Supplementary file [file 15296894]

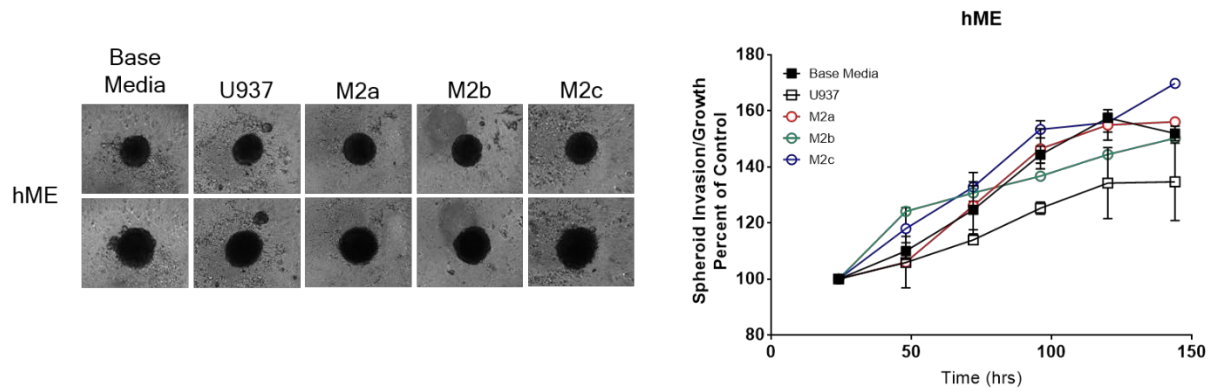

**Supplemental Figure S2.** Results from spheroid invasion assays display conditioned media from M2 macrophages has a minimal effect on human mammary epithelial cells (hME). Images are representative images selected from a single experiment (left). Averaged data is compiled from two independent experiments. Error bars represent standard deviation.

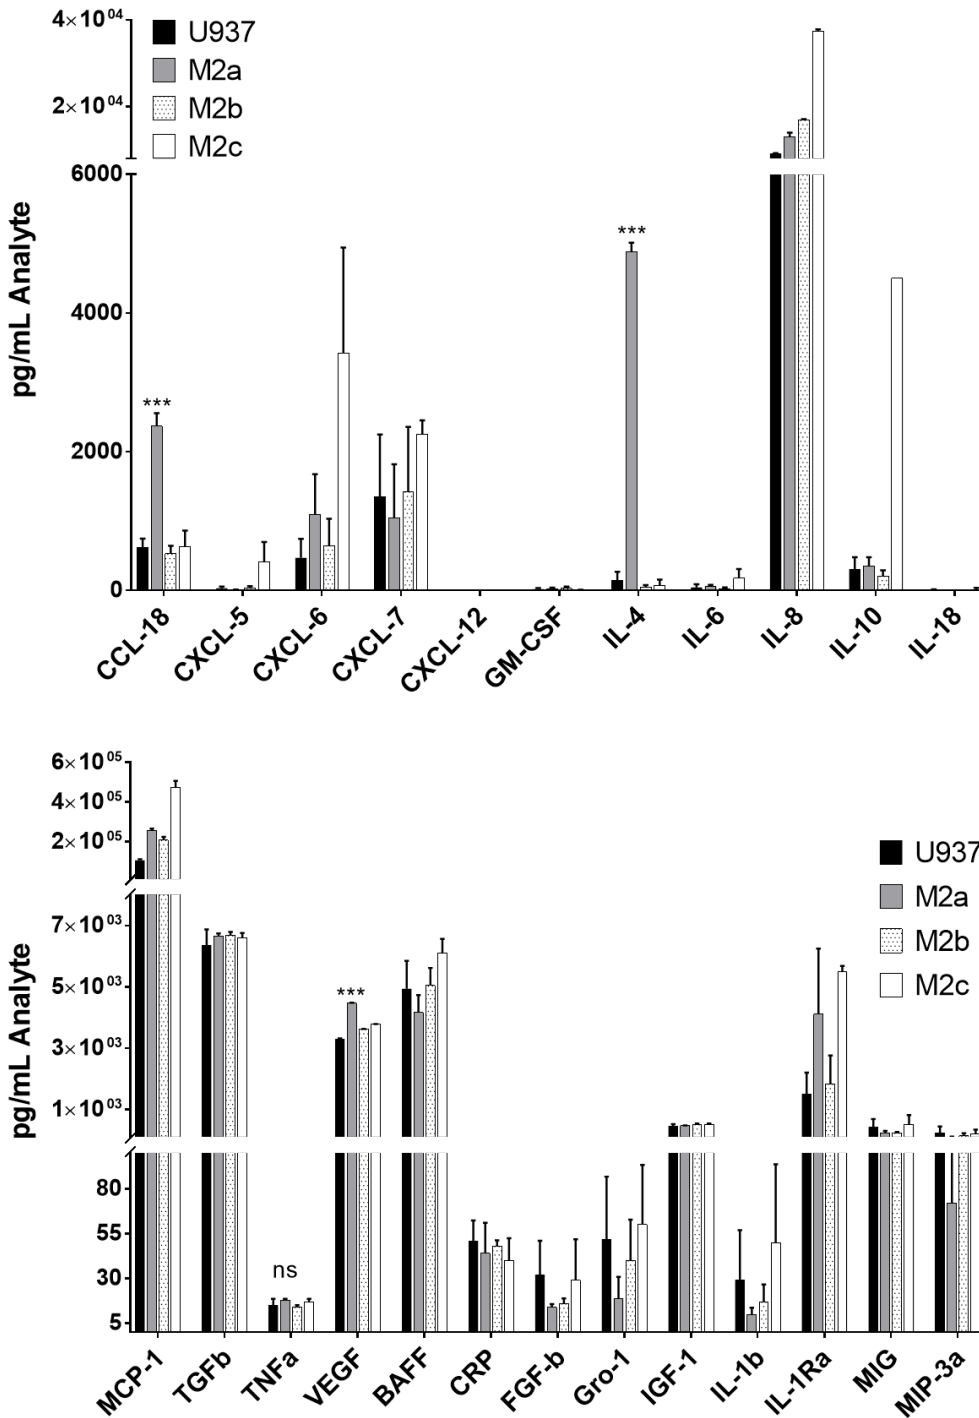

**Supplemental Figure S3.** ELISA results of various secreted components in the conditioned media isolated from either U937 monocyte or M2-macrophage cell populations. Averaged data is compiled from three independent experiments. Statistical significance was determined by one-way ANOVA; \*\*\*p<0.001. Error bars represent standard deviation.

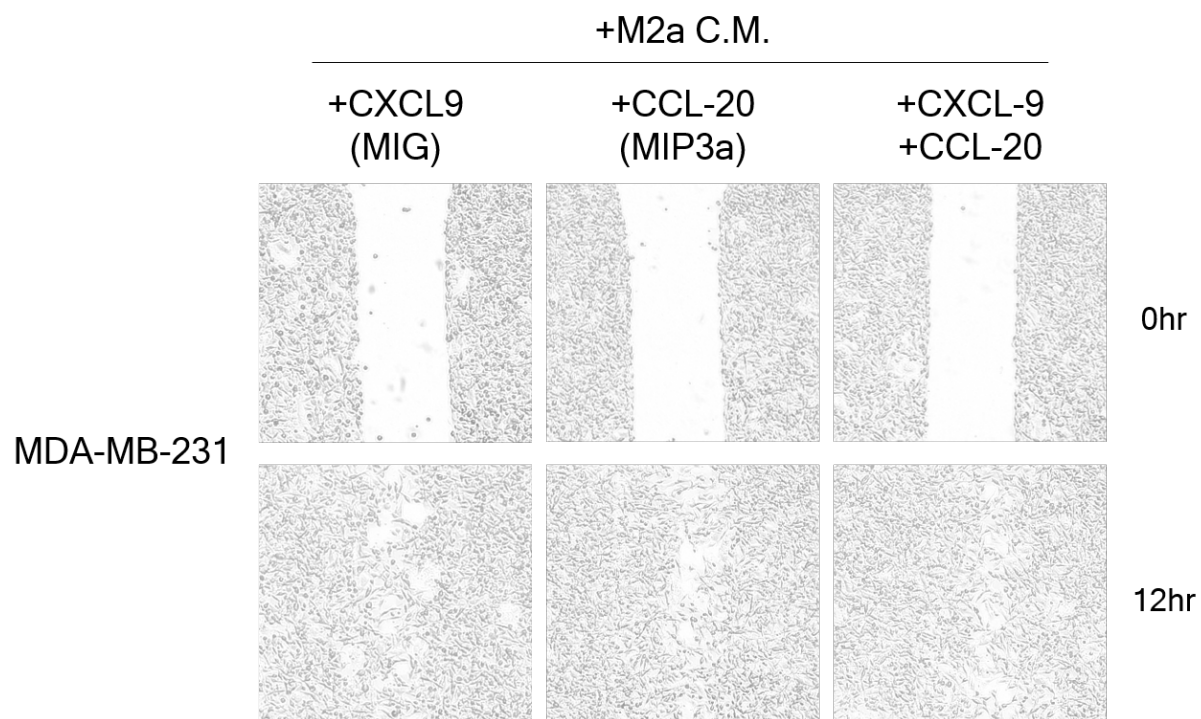

**Supplemental Figure S4.** Exogenous addition of inhibitory proteins, MIG, or MIP3a, do not affect M2a-induced migration. Results from MDA-MB-231 cells stimulated with M2a conditioned media, supplemented with recombinant CXCL-9 (MIG), CCL-20 (MIP3a), or both cytokines together, does not inhibit M2a macrophage induced migration. Images representative of 2 independent experiments.

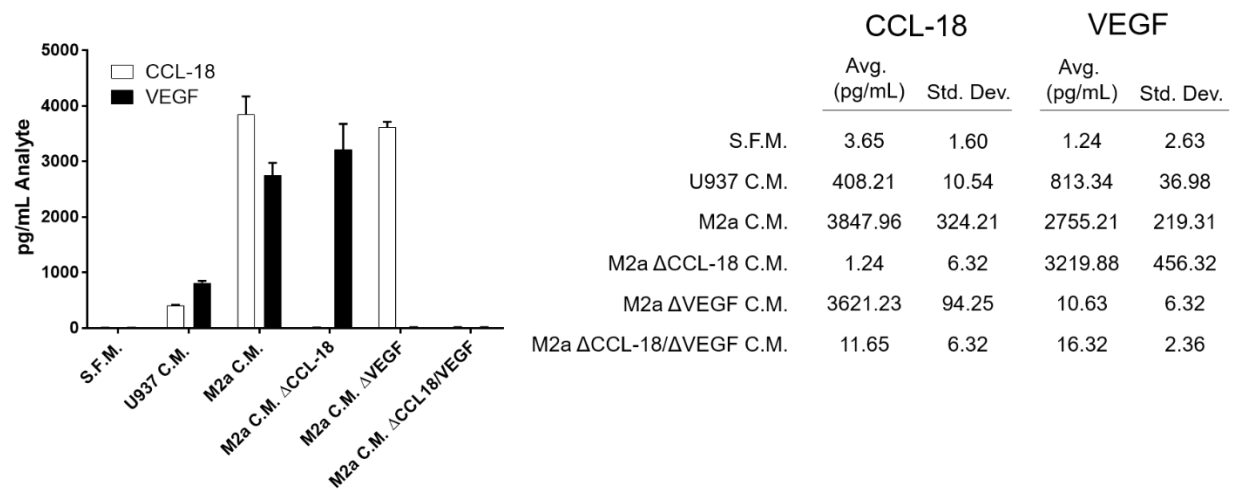

**Supplemental Figure 5.** ELISA results from CCL-18 and/or VEGF analyte removal assay shows complete depletion of CCL-18 and/or VEGF in target concentrated medias. Raw values in pg/mL displayed right. Data is compiled from 3 independent experiments.

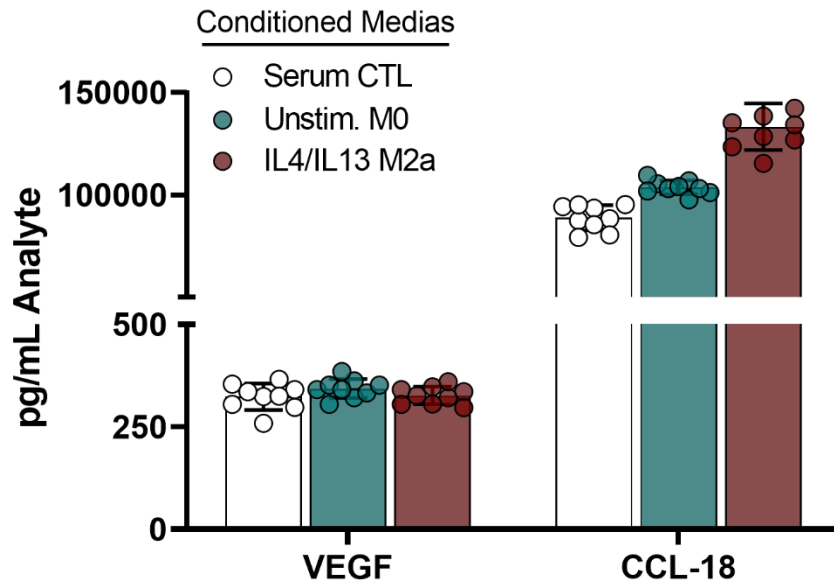

**Supplemental Figure 6.** ELISA results displaying levels of VEGF or CCL-18 in conditioned media from primary human macrophages. Results depict raw values of conditioned media from monocyte/macrophage serum-containing media (white), M-CSF polarized unstimulated macrophages (green), or M-CSF polarized IL-4/IL-13 stimulated M2a macrophages (red). Data is compiled from three independent experiments.

| Gene                      | $r^2$ | E %     | Sequence (5'-3')                                               |
|---------------------------|-------|---------|----------------------------------------------------------------|
| TLR4                      | 0.981 | 101.832 | F: TGC GTGAGACCAGAAAGC<br>R: TTAAAGCTCAGGTCCAGGTTC             |
| S100A9                    | 0.999 | 94.193  | F: TGACAGAGTGCAAGACGATG<br>R: ACCAGCTCTTTGAATTCCCC             |
| TLR2                      | 0.998 | 94.709  | F: AGACCTATAGTGACTCCCAGG<br>R: ACCCACACCATCCACAAAG             |
| TGF $\beta$               | 0.999 | 95.01   | F: GCCTTTCCTGCTTCTCATGG<br>R: TCCTTGCGGAAGTCAATGTAC            |
| DCR3                      | 0.997 | 93.853  | F: TCAATGTGCCAGGCTCTTC<br>R: CAGCCTCTTGATGGAGATGTC             |
| CD86                      | 0.985 | 104.115 | F: TCCCTGATGTTACGAGCAATATG<br>R: ATCCAAGGAATGTGGTCTGG          |
| MHC2                      | 0.993 | 102.598 | F: CAGAATGGAGACTGGACCTTC<br>R: TGTGCAGATTCAGACCGTG             |
| CD68                      | 0.981 | 100.29  | F: CATCTCTGTACTGAACCCCAAC<br>R: CCATGTAGCTCAGGTAGACAAC         |
| IL1 $\alpha$              | 0.982 | 114.731 | F: TGTATGTGACTGCCCAAGATG<br>R: TTAGTGCCGTGAGTTTCCC             |
| TGM2                      | 0.988 | 123.303 | F: TCAGCTACAATGGGATCTTGG<br>R: AAGGCAGTCACGGTATTTCTC           |
| SOCS3                     | 0.972 | 98.48   | F: CTATGAGAAAGTCACCCAGCTG<br>R: CTTGTGCTTGTGCCATGTG            |
| IL1 $\beta$               | 0.943 | 108.846 | F: ATGCACCTGTACGATCACTG<br>R: ACAAAGGACATGGAGAACACC            |
| MGL1                      | 0.958 | 107.126 | F: CTTGATCCCTACAGTGACG<br>R: CACATCACTAAGCTCCAGTACC            |
| TNF $\alpha$              | 0.975 | 117.833 | F: GAGAAGCAACTACAGACCCC<br>R: CATGCTTTCAGTGCTCATGG             |
| TLR1                      | 0.99  | 111.135 | F: TTAGAAGAAATCAGGATAACAAAG<br>GC<br>R: GGCAAAATGGAAGATGCTAGTC |
| IL10                      | 0.99  | 127.98  | F: ATGCCCAAGCTGAGAAC<br>R: GCCTTGCTCTTGTTTTACAG                |
| TLR8                      | 0.973 | 125.292 | F: ACAACCCGAAGGCAGAAG<br>R: GGCGCGAAATCATGACTTAAC              |
| CLEC7a                    | 0.996 | 106.401 | F: TCGACTCTCAAAGCAATACCAG<br>R: CCACAGCTATCACCAGTATTACC        |
| IL1R2                     | 0.99  | 101.341 | F: CGTGACAAAAGTACGTGAAG<br>R: CAGGACACAGCGGTAATAGC             |
| IL1R1                     | 0.987 | 91.55   | F: AGATGACAGCAAGACACCTG<br>R: TCTGAGGCAGTAAGATGAATTTCT         |
| CD163                     | 0.963 | 77.956  | F: GAGTCCCTTCACCATTACTGTG<br>R: GACTTTCACCTCCACTCTCCC          |
| CD80                      | 0.952 | 71.178  | F: AAGTGGAGTCTTACCCTGAAATC<br>R: AAGACCCTCCAGTGATGTTTAC        |
| MRC1                      | 0.972 | 127.571 | F: ACAGTTATGCCTACCATGCC<br>R: CCCTCCAAAGCCTATACAAGC            |
| *E % = Percent Efficiency |       |         |                                                                |

**Supplemental Table 1.** RT-qPCR primer sequences and corresponding efficiency scores utilized for this study.
